# Supplementary material for: Synthesis of iron oxide quantum dots by non-thermal atmospheric pressure plasma electrolysis: influence of operating conditions and biomedical applications
Source: Royal Society of Chemistry journal article supplement (doi:10.1039/d5ra02857d), 2025-01-01
Supplement: d5ra02857d1.pdf [file d5ra02857d1.pdf]

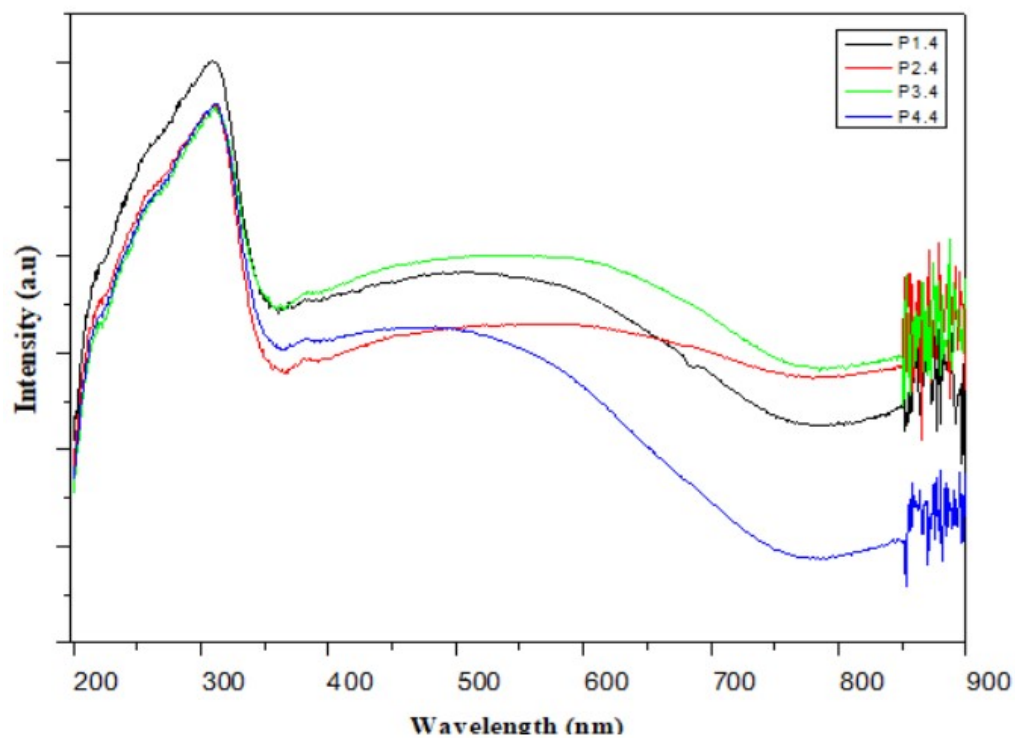

**Figure 1: UV Vis absorption spectra of IOQDs synthesized under various environments.**

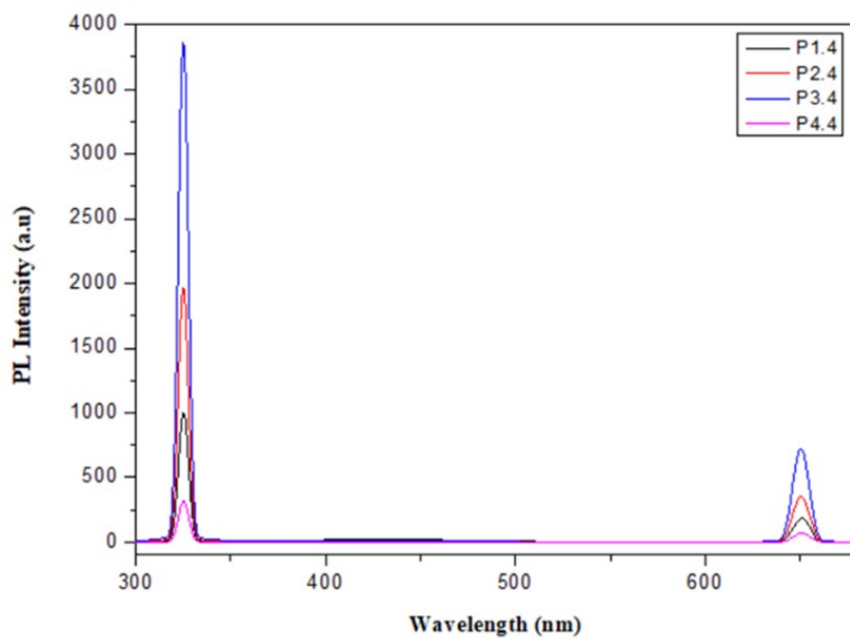

**Figure 2: PL spectra of IOQDs synthesized under various environments**

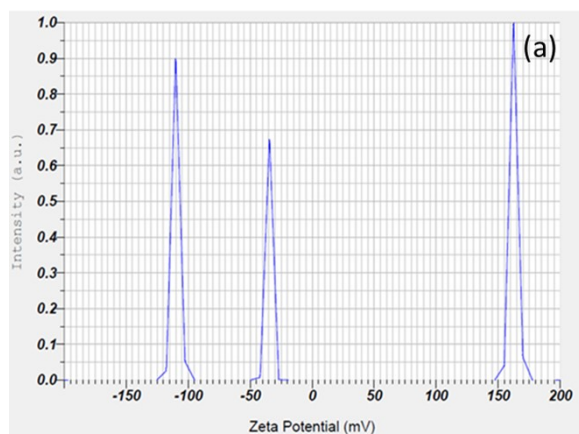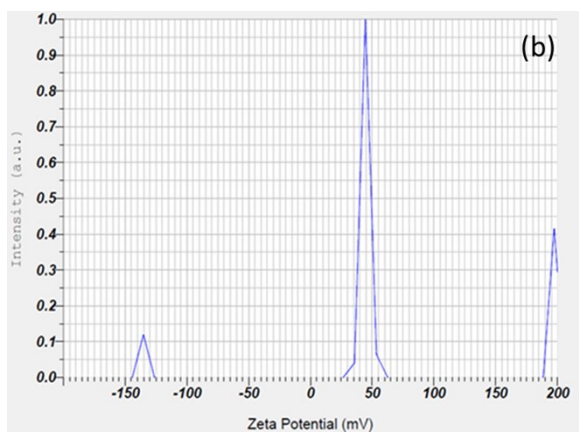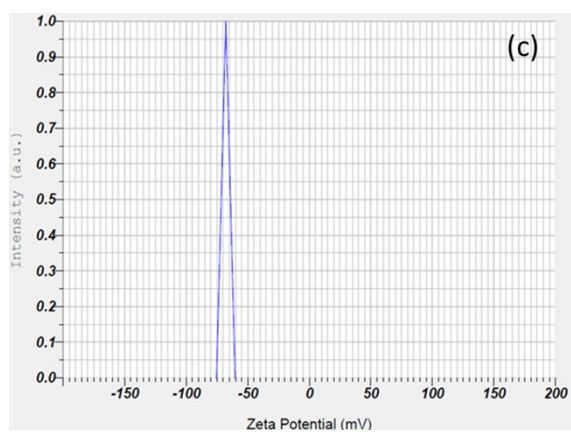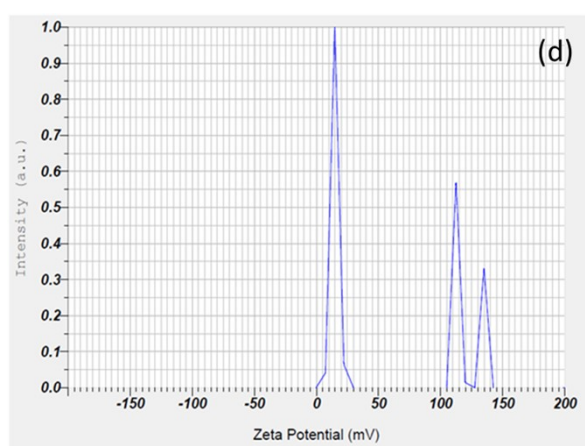

**Figure 3 Zeta potential of IO QDs synthesized under different environments: (a) O<sub>2</sub>, (b) Air, (c) N<sub>2</sub>, and (d) Ar**
